# Supplementary material for: Bioacoustic classification of avian calls from raw sound waveforms with an open-source deep learning architecture
Source: PubMed Central journal article supplement (PMC8333097; doi:10.1038/s41598-021-95076-6), 2021-08-03
Supplement: 41598_2021_95076_MOESM1_ESM.pdf [file 41598_2021_95076_MOESM1_ESM.pdf]

---

# Bioacoustic Classification of Avian Calls from Raw Sound Waveforms with an Open-source Deep Learning Architecture

---

Francisco J. Bravo Sanchez, Md Rahat Hossain, Nathan B. English & Steven T. Moore

## SUPPLEMENTARY INFORMATION

This document includes the following: model parameters, additional metrics and parameters tested during SincNet hyperparameter tuning.

### 1. Model Parameters

Tables S1 to S6 detail the parameters used for each model or type of model presented in the main text. They are grouped by model type: SincNet Default (Timit and Librispeech), SincNet Enhanced, Waveform+CNN and pre-trained models. Detail parameters are provided for each tag class selection (all classes, bird classes and bird species) but not for SincNet Default as only class\_lay differs between class selections.

Both the SincNet and Waveform+CNN models use the SincNet code and the parameters are presented with the same nomenclature used in SincNet configuration files (.cfg) except for the amplification factor which is hard-coded and not included in the configuration. We maintain this nomenclature for the pre-trained models (tables S4 to S6) when they use the same parameters.

The size of each SincNet training epoch is controlled by the size of each random minibatch (batch\_size) and the number of batches (N\_batches), and is independent of the size of the training dataset. In the pre-trained models the size of each epoch corresponds to the size of the training dataset to a maximum of 4110 files (the size of the training dataset is provided in tables S4 to S6). Therefore the number of files processed over each epoch is greater in SincNet than in the pre-trained models.

Note that, as indicated in the main text, SincNet code assigns the function LogSoftmax to the configuration selection of softmax (such as class\_act).

| SincNet Default         |                                                        |                              |
|-------------------------|--------------------------------------------------------|------------------------------|
| Parameter               | Timit                                                  | Librispeech                  |
| [windowing]             |                                                        |                              |
| fs                      | 44100                                                  | 44100                        |
| cw_len                  | 10                                                     | 10                           |
| cw_shift                | 1                                                      | 1                            |
| fact_amp                | 0.2 (default hard coded)                               | 0.2 (default hard coded)     |
| [cnn]                   |                                                        |                              |
| cnn_N_filt              | 80,60,60                                               | 80,60,60                     |
| cnn_len_filt            | 251,5,5                                                | 251,5,5                      |
| cnn_max_pool_len        | 3,3,3                                                  | 3,3,3                        |
| cnn_use_laynorm_inp     | True                                                   | True                         |
| cnn_use_batchnorm_inp   | False                                                  | False                        |
| cnn_use_laynorm         | True,True,True                                         | True,True,True               |
| cnn_use_batchnorm       | False,False,False                                      | False,False,False            |
| cnn_act                 | leaky_relu,leaky_relu, leaky_relu                      | relu,relu,relu               |
| cnn_drop                | 0.0,0.0,0.0                                            | 0.0,0.0,0.0                  |
| [dnn]                   |                                                        |                              |
| fc_lay                  | 2048,2048,2048                                         | 2048,2048,2048               |
| fc_drop                 | 0.0,0.0,0.0                                            | 0.0,0.0,0.0                  |
| fc_use_laynorm_inp      | True                                                   | True                         |
| fc_use_batchnorm_inp    | False                                                  | False                        |
| fc_use_batchnorm        | True,True,True                                         | True,True,True               |
| fc_use_laynorm          | False,False,False                                      | False,False,False            |
| fc_act                  | leaky_relu,leaky_relu,leaky_relu                       | leaky_relu,linear,leaky_relu |
| [class]                 |                                                        |                              |
| class_lay               | All Classes - 87, Bird Classes - 77, Bird Species - 51 |                              |
| class_drop              | 0.0                                                    | 0.0                          |
| class_use_laynorm_inp   | False                                                  | True                         |
| class_use_batchnorm_inp | False                                                  | False                        |
| class_use_batchnorm     | False                                                  | False                        |
| class_use_laynorm       | False                                                  | False                        |
| class_act               | softmax                                                | softmax                      |
| [optimization]          |                                                        |                              |
| lr                      | 0.001                                                  | 0.001                        |
| batch_size              | 128                                                    | 128                          |
| N_epochs                | 200                                                    | 200                          |
| N_batches               | 800                                                    | 800                          |
| N_eval_epoch            | 8                                                      | 8                            |
| seed                    | 1234                                                   | 1234                         |

Table S1: Training parameters for SincNet models using default configurations

| SincNet Enhanced        |                                      |                                      |                                      |
|-------------------------|--------------------------------------|--------------------------------------|--------------------------------------|
| Parameter               | All Classes                          | Bird Classes                         | Bird Species                         |
| [windowing]             |                                      |                                      |                                      |
| fs                      | 44100                                | 44100                                | 44100                                |
| cw_len                  | 18                                   | 16                                   | 16                                   |
| cw_shift                | 1                                    | 1                                    | 1                                    |
| fact_amp                | 0                                    | 0                                    | 0                                    |
| [cnn]                   |                                      |                                      |                                      |
| cnn_N_filt              | 220,60,60                            | 220,60,60                            | 220,60,60                            |
| cnn_len_filt            | 151,5,5                              | 151,5,5                              | 151,5,5                              |
| cnn_max_pool_len        | 5,5,5                                | 5,5,5                                | 5,5,5                                |
| cnn_use_laynorm_inp     | False                                | False                                | False                                |
| cnn_use_batchnorm_inp   | False                                | False                                | False                                |
| cnn_use_laynorm         | False,False,False                    | False,False,False                    | False,False,False                    |
| cnn_use_batchnorm       | True,True,True                       | True,True,True                       | True,True,True                       |
| cnn_act                 | leaky_relu,leaky_relu,<br>leaky_relu | leaky_relu,leaky_relu,<br>leaky_relu | leaky_relu,leaky_relu,<br>leaky_relu |
| cnn_drop                | 0.0,0.0,0.0                          | 0.0,0.0,0.0                          | 0.0,0.0,0.0                          |
| [dnn]                   |                                      |                                      |                                      |
| fc_lay                  | 1024,1024,1024                       | 1024,1024,1024                       | 1024,1024,1024                       |
| fc_drop                 | 0.0,0.0,0.0                          | 0.0,0.0,0.0                          | 0.0,0.0,0.0                          |
| fc_use_laynorm_inp      | False                                | False                                | False                                |
| fc_use_batchnorm_inp    | False                                | False                                | False                                |
| fc_use_batchnorm        | True,True,True                       | True,True,True                       | True,True,True                       |
| fc_use_laynorm          | False,False,False                    | False,False,False                    | False,False,False                    |
| fc_act                  | relu,relu,relu                       | relu,relu,relu                       | relu,relu,relu                       |
| [class]                 |                                      |                                      |                                      |
| class_lay               | 87                                   | 77                                   | 51                                   |
| class_drop              | 0.0                                  | 0.0                                  | 0.0                                  |
| class_use_laynorm_inp   | False                                | False                                | False                                |
| class_use_batchnorm_inp | False                                | False                                | False                                |
| class_use_batchnorm     | False                                | False                                | False                                |
| class_use_laynorm       | False                                | False                                | False                                |
| class_act               | softmax                              | softmax                              | softmax                              |
| [optimization]          |                                      |                                      |                                      |
| lr                      | 0.001                                | 0.001                                | 0.001                                |
| batch_size              | 128                                  | 128                                  | 128                                  |
| N_epochs                | 400                                  | 400                                  | 400                                  |
| N_batches               | 80                                   | 80                                   | 80                                   |
| N_eval_epoch            | 8                                    | 8                                    | 8                                    |
| seed                    | 1234                                 | 1234                                 | 1234                                 |

Table S2: Training parameters for enhanced SincNet models

| <b>Waveform+CNN</b>     |                                      |                                      |                                      |
|-------------------------|--------------------------------------|--------------------------------------|--------------------------------------|
| <b>Parameter</b>        | <b>All Classes</b>                   | <b>Bird Classes</b>                  | <b>Bird Species</b>                  |
| [windowing]             |                                      |                                      |                                      |
| fs                      | 44100                                | 44100                                | 44100                                |
| cw_len                  | 14                                   | 14                                   | 10                                   |
| cw_shift                | 1                                    | 1                                    | 1                                    |
| fact_amp                | 0                                    | 0                                    | 0                                    |
| [cnn]                   |                                      |                                      |                                      |
| cnn_N_filt              | 210,60,60                            | 210,60,60                            | 210,60,60                            |
| cnn_len_filt            | 151,5,5                              | 151,5,5                              | 151,5,5                              |
| cnn_max_pool_len        | 5,5,5                                | 5,5,5                                | 5,5,5                                |
| cnn_use_laynorm_inp     | False                                | False                                | False                                |
| cnn_use_batchnorm_inp   | False                                | False                                | False                                |
| cnn_use_laynorm         | False,False,False                    | False,False,False                    | False,False,False                    |
| cnn_use_batchnorm       | True,True,True                       | True,True,True                       | True,True,True                       |
| cnn_act                 | leaky_relu,leaky_relu,<br>leaky_relu | leaky_relu,leaky_relu,<br>leaky_relu | leaky_relu,leaky_relu,<br>leaky_relu |
| cnn_drop                | 0.0,0.0,0.0                          | 0.0,0.0,0.0                          | 0.0,0.0,0.0                          |
| [dnn]                   |                                      |                                      |                                      |
| fc_lay                  | 1024,1024,1024                       | 1024,1024,1024                       | 1024,1024,1024                       |
| fc_drop                 | 0.0,0.0,0.0                          | 0.0,0.0,0.0                          | 0.0,0.0,0.0                          |
| fc_use_laynorm_inp      | False                                | False                                | False                                |
| fc_use_batchnorm_inp    | False                                | False                                | False                                |
| fc_use_batchnorm        | True,True,True                       | True,True,True                       | True,True,True                       |
| fc_use_laynorm          | False,False,False                    | False,False,False                    | False,False,False                    |
| fc_act                  | leaky_relu,leaky_relu,<br>leaky_relu | leaky_relu,leaky_relu,<br>leaky_relu | leaky_relu,leaky_relu,<br>leaky_relu |
| [class]                 |                                      |                                      |                                      |
| class_lay               | 87                                   | 77                                   | 51                                   |
| class_drop              | 0.0                                  | 0.0                                  | 0.0                                  |
| class_use_laynorm_inp   | False                                | False                                | False                                |
| class_use_batchnorm_inp | False                                | False                                | False                                |
| class_use_batchnorm     | False                                | False                                | False                                |
| class_use_laynorm       | False                                | False                                | False                                |
| class_act               | softmax                              | softmax                              | softmax                              |
| [optimization]          |                                      |                                      |                                      |
| lr                      | 0.001                                | 0.001                                | 0.001                                |
| batch_size              | 128                                  | 128                                  | 128                                  |
| N_epochs                | 400                                  | 400                                  | 400                                  |
| N_batches               | 80                                   | 80                                   | 80                                   |
| N_eval_epoch            | 4                                    | 4                                    | 4                                    |
| seed                    | 1234                                 | 1234                                 | 1234                                 |

*Table S3: Training parameters for waveform + CNN models*

| <b>DenseNet121</b>       |                    |                     |                     |
|--------------------------|--------------------|---------------------|---------------------|
| <b>Parameter</b>         | <b>All Classes</b> | <b>Bird Classes</b> | <b>Bird Species</b> |
| fs                       | 44100              | 44100               | 44100               |
| cw_len                   | 3000               | 3000                | 3000                |
| fact_amp                 | 0                  | 0                   | 0                   |
| Sound features           | Mel                | Spectrogram         | Mel                 |
| lr (initial)             | 0.0001             | 0.0001              | 0.0001              |
| batch_size               | 10                 | 10                  | 10                  |
| shuffle                  | True               | True                | True                |
| N_epochs                 | 50                 | 50                  | 50                  |
| class_lay                | 87                 | 77                  | 51                  |
| % trainable layers       | 30%                | 30%                 | 30%                 |
| Size of training dataset | 4110               | 3959                | 3959                |

*Table S4: Training parameters for pre-trained DenseNet121 models*

| <b>ResNet50</b>          |                    |                     |                     |
|--------------------------|--------------------|---------------------|---------------------|
| <b>Parameter</b>         | <b>All Classes</b> | <b>Bird Classes</b> | <b>Bird Species</b> |
| fs                       | 44100              | 44100               | 44100               |
| cw_len                   | 3000               | 3000                | 3000                |
| fact_amp                 | 0                  | 0                   | 0                   |
| Sound features           | Mel                | Mel                 | Mel                 |
| lr (initial)             | 0.0001             | 0.0001              | 0.0001              |
| batch_size               | 20                 | 20                  | 20                  |
| shuffle                  | True               | True                | True                |
| N_epochs                 | 50                 | 50                  | 50                  |
| class_lay                | 87                 | 77                  | 51                  |
| % trainable layers       | 34%                | 34%                 | 34%                 |
| Size of training dataset | 4110               | 3959                | 3959                |

*Table S5: Training parameters for pre-trained ResNet50 models*

| <b>VGG16</b>             |                    |                     |                     |
|--------------------------|--------------------|---------------------|---------------------|
| <b>Parameter</b>         | <b>All Classes</b> | <b>Bird Classes</b> | <b>Bird Species</b> |
| fs                       | 44100              | 44100               | 44100               |
| cw_len                   | 3000               | 3000                | 3000                |
| fact_amp                 | 0                  | 0                   | 0                   |
| Sound features           | Mel                | Spectrogram         | Mel                 |
| lr (initial)             | 0.0001             | 0.0001              | 0.0001              |
| batch_size               | 5                  | 5                   | 5                   |
| shuffle                  | True               | True                | True                |
| N_epochs                 | 50                 | 50                  | 50                  |
| class_lay                | 87                 | 77                  | 51                  |
| % trainable layers       | 32%                | 32%                 | 32%                 |
| Size of training dataset | 4110               | 3959                | 3959                |

*Table S6: Training parameters for pre-trained VGG16 models*

## 2. Additional Metrics

### 2.1. Metrics for Selected Models

Table S7 lists additional metrics for selected models. It repeats some of the metrics included in Table 1 of the main text to provide context. The calculation of false positive rates and false negative rates is weighted across classes. “ROC AUC Mean Exp” provides an alternative calculation of the ROC AUC. The original ROC AUC calculation uses probabilities obtained by averaging for each tagged call, the LogSoftmax output of each frame (a logarithmic value). The alternative “ROC AUC Mean Exp” calculates the exponential of the LogSoftmax output for each frame before averaging across the tag. These values are provided both for SincNet and Waveform + CNN models.

| Model          | Accuracy | ROC AUC | Precision | Recall | F1     | False Positive Rate | False Negative Rate | ROC AUC Mean Exp |
|----------------|----------|---------|-----------|--------|--------|---------------------|---------------------|------------------|
| All classes    |          |         |           |        |        |                     |                     |                  |
| DenseNet121    | 0.7484   | 0.7971  | 0.7639    | 0.7544 | 0.7404 | 0.0044              | 0.2233              | -                |
| ResNet50       | 0.7403   | 0.7897  | 0.7562    | 0.7441 | 0.7277 | 0.0050              | 0.2105              | -                |
| SincNet        | 0.7301   | 0.7562  | 0.7489    | 0.7301 | 0.7231 | 0.0062              | 0.2303              | 0.7591           |
| VGG16          | 0.7294   | 0.7723  | 0.7346    | 0.7331 | 0.7182 | 0.0043              | 0.2336              | -                |
| Waveform + CNN | 0.7017   | 0.7425  | 0.7216    | 0.7017 | 0.6889 | 0.0075              | 0.2376              | 0.7669           |
| Bird classes   |          |         |           |        |        |                     |                     |                  |
| ResNet50       | 0.7674   | 0.8129  | 0.7692    | 0.7674 | 0.7582 | 0.0045              | 0.2008              | -                |
| DenseNet121    | 0.7545   | 0.8290  | 0.7630    | 0.7632 | 0.7398 | 0.0044              | 0.2096              | -                |
| VGG16          | 0.7530   | 0.7935  | 0.7593    | 0.7553 | 0.7456 | 0.0042              | 0.2283              | -                |
| SincNet        | 0.7447   | 0.7662  | 0.7625    | 0.7447 | 0.7408 | 0.0057              | 0.2219              | 0.7865           |
| Waveform + CNN | 0.7205   | 0.7593  | 0.7348    | 0.7205 | 0.7125 | 0.0066              | 0.2373              | 0.7783           |
| Bird species   |          |         |           |        |        |                     |                     |                  |
| ResNet50       | 0.7689   | 0.8046  | 0.7645    | 0.7689 | 0.7554 | 0.0071              | 0.1925              | -                |
| DenseNet121    | 0.7659   | 0.8100  | 0.7664    | 0.7659 | 0.7583 | 0.0077              | 0.2196              | -                |
| VGG16          | 0.7598   | 0.8174  | 0.7613    | 0.7633 | 0.7505 | 0.0073              | 0.2175              | -                |
| SincNet        | 0.7356   | 0.7485  | 0.7481    | 0.7356 | 0.7408 | 0.0057              | 0.2219              | 0.7865           |
| Waveform + CNN | 0.7091   | 0.7618  | 0.7285    | 0.7091 | 0.7046 | 0.0109              | 0.2552              | 0.7694           |

Table S7: Additional metrics for selected models, grouped by tag selection and then sorted by accuracy

### 2.2. Metrics for Default SincNet Models

The SincNet repository provides two sets of default settings for two different datasets: Timit and Librispeech. Table S8 list the metrics for models trained using these settings adapted as indicated in table S1.

| Model        | Accuracy | ROC AUC | Precision | Recall | Top 3 Accuracy | Top 5 Accuracy | F1     | False Positive Rate | False Negative Rate |
|--------------|----------|---------|-----------|--------|----------------|----------------|--------|---------------------|---------------------|
| All classes  |          |         |           |        |                |                |        |                     |                     |
| Timit        | 0.6321   | 0.7511  | 0.6707    | 0.6321 | 0.8336         | 0.8920         | 0.6246 | 0.0104              | 0.3094              |
| Librispeech  | 0.6404   | 0.7559  | 0.6713    | 0.6404 | 0.8366         | 0.8942         | 0.6220 | 0.0113              | 0.2714              |
| Bird classes |          |         |           |        |                |                |        |                     |                     |
| Timit        | 0.6353   | 0.7577  | 0.6895    | 0.6353 | 0.8226         | 0.8870         | 0.6261 | 0.0149              | 0.2799              |
| Librispeech  | 0.6455   | 0.7494  | 0.6897    | 0.6455 | 0.8280         | 0.8841         | 0.6349 | 0.0125              | 0.2816              |
| Bird species |          |         |           |        |                |                |        |                     |                     |
| Timit        | 0.6778   | 0.7789  | 0.7087    | 0.6778 | 0.8734         | 0.9257         | 0.6613 | 0.0184              | 0.2500              |
| Librispeech  | 0.6394   | 0.7654  | 0.6766    | 0.6394 | 0.8470         | 0.9167         | 0.6330 | 0.0178              | 0.3004              |

Table S8: Metrics for SincNet models using default settings

### 2.3. ROC AUC Plots for SincNet Models

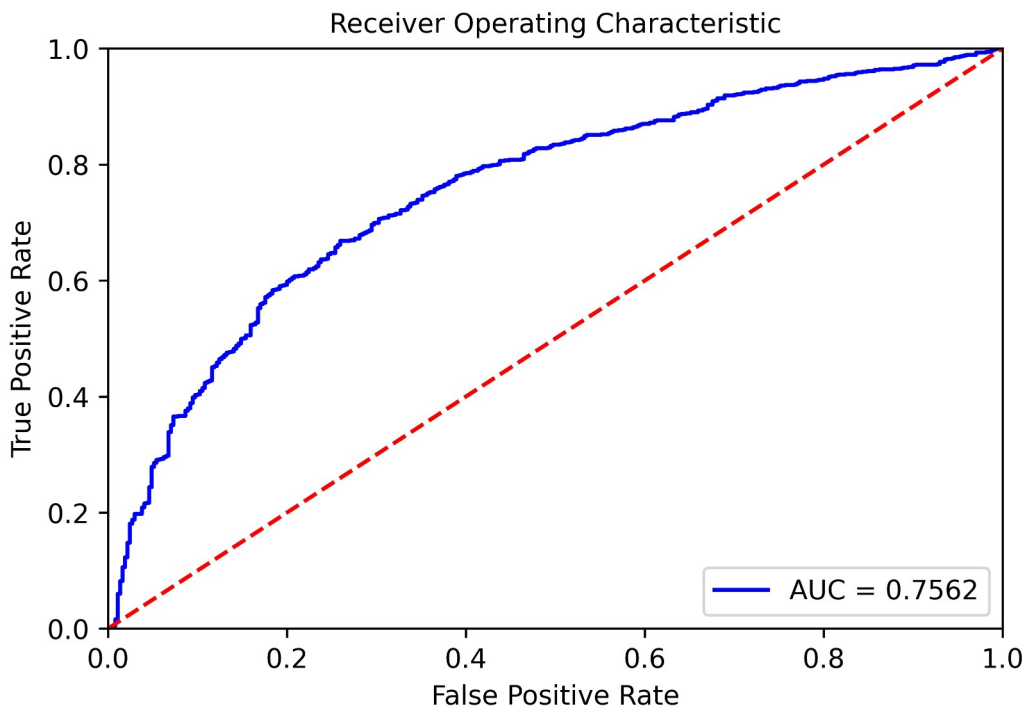

Figure S 1: ROC AUC plot for enhanced SincNet model - All classes



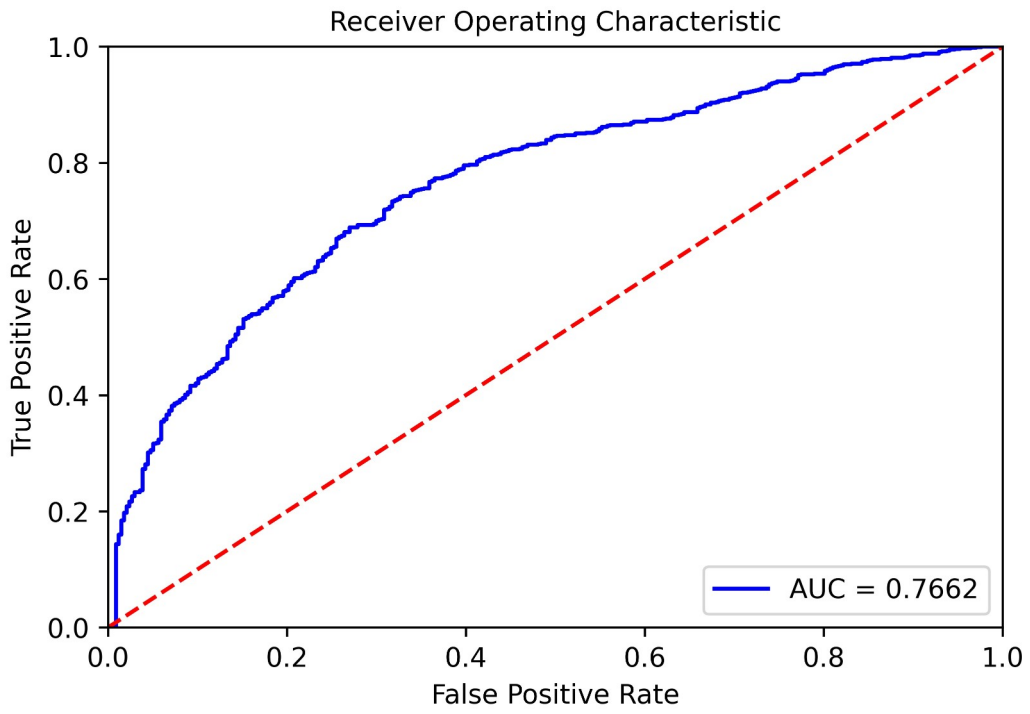

Figure S 2: ROC AUC plot for enhanced SincNet model - Bird classes

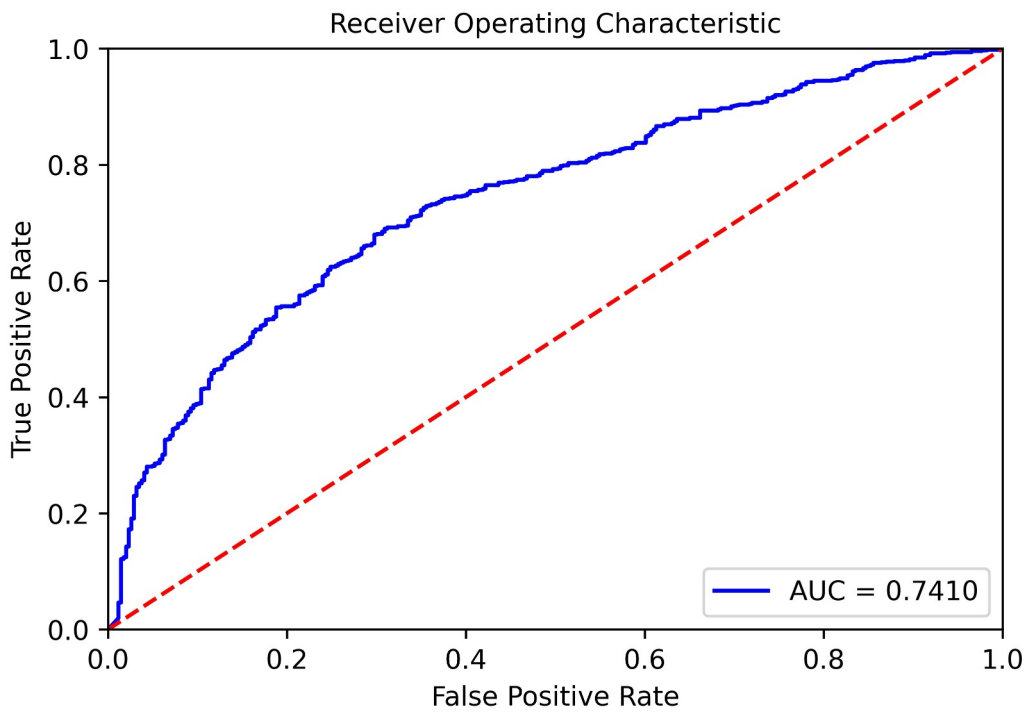

Figure S 3: ROC AUC plot for enhanced SincNet model - Bird species

### 3. Parameters Tested

Table S 7 lists the parameters tested for hyperparameter tuning. Note that code modifications were required to test some of the values listed in the following parameters: `cw_len`, `fact_amp` and `class_act`.

| Parameter                            | Values Tested                                                                                                                                                                                                                                                                                                                                                                                   |
|--------------------------------------|-------------------------------------------------------------------------------------------------------------------------------------------------------------------------------------------------------------------------------------------------------------------------------------------------------------------------------------------------------------------------------------------------|
| [windowing]                          |                                                                                                                                                                                                                                                                                                                                                                                                 |
| <code>cw_len</code>                  | 8, 8.5, 9, 9.5, 10, 11, 12, 13, 14, 15, 16, 17, 18, 19, 20, 21, 22, 23, 24, 25, 26, 27, 28, 29, 30, 35, 40, 45, 50                                                                                                                                                                                                                                                                              |
| <code>fact_amp</code>                | 0, 0.1, 0.2, 0.3                                                                                                                                                                                                                                                                                                                                                                                |
| [cnn]                                |                                                                                                                                                                                                                                                                                                                                                                                                 |
| <code>cnn_N_filt</code>              | [70,50,50], [80,40,40], [80,50,50], [90,60,60], [90,80,80], [100,50,50], [100,60,60], [110,50,50], [110,60,60], [120,50,50], [120,60,60], [130,60,60], [140,60,60], [150,60,60], [160,60,60], [170,60,60], [180,60,60], [190,60,60], [200,60,60], [210,60,60], [220,60,60], [230,50,50], [230,60,60], [230,70,70], [250,60,60], [260,60,60], [270,60,60], [280,60,60], [290,60,60], [300,60,60] |
| <code>cnn_len_filt</code>            | [51,4,4], [51,5,5], [101,5,5], [121,6,6], [126,4,4], [126,5,5], [126,6,6], [151,4,4], [151,5,5], [151,6,6], [151,7,7], [151,8,8], [176,5,5], [176,6,6], [251,4,4], [251,6,6], [351,5,5]                                                                                                                                                                                                         |
| <code>cnn_max_pool_len</code>        | [2,2,2], [3,3,3], [4,4,4], [4,5,6], [5,5,5]                                                                                                                                                                                                                                                                                                                                                     |
| <code>cnn_use_laynorm_inp</code>     | False, True                                                                                                                                                                                                                                                                                                                                                                                     |
| <code>cnn_use_batchnorm_inp</code>   | False                                                                                                                                                                                                                                                                                                                                                                                           |
| <code>cnn_use_laynorm</code>         | [False,False,False], [True,True,True]                                                                                                                                                                                                                                                                                                                                                           |
| <code>cnn_use_batchnorm</code>       | [False,False,False], [True,True,True]                                                                                                                                                                                                                                                                                                                                                           |
| <code>cnn_act</code>                 | [leaky_relu,leaky_relu,leaky_relu], [relu,relu,relu], [sigmoid,sigmoid,sigmoid], [tanh,tanh,tanh]                                                                                                                                                                                                                                                                                               |
| <code>cnn_drop</code>                | [0,0,0], [0.1,0.1,0.1], [0.25,0.25,0.25], [0.5,0.5,0.5]                                                                                                                                                                                                                                                                                                                                         |
| [dnn]                                |                                                                                                                                                                                                                                                                                                                                                                                                 |
| <code>fc_lay</code>                  | [1024,1024,1024], [1536,1536,1536], [2048,2048,2048], [3072,3072,3072], [4096,4096,4096]                                                                                                                                                                                                                                                                                                        |
| <code>fc_drop</code>                 | [0,0,0], [0.1,0.1,0.1], [0.25,0.25,0.25], [0.5,0.5,0.5]                                                                                                                                                                                                                                                                                                                                         |
| <code>fc_use_laynorm_inp</code>      | False, True                                                                                                                                                                                                                                                                                                                                                                                     |
| <code>fc_use_batchnorm_inp</code>    | False                                                                                                                                                                                                                                                                                                                                                                                           |
| <code>fc_use_batchnorm</code>        | [False,False,False], [True,True,True]                                                                                                                                                                                                                                                                                                                                                           |
| <code>fc_use_laynorm</code>          | [False,False,False], [True,True,True]                                                                                                                                                                                                                                                                                                                                                           |
| <code>fc_act</code>                  | [leaky_relu,leaky_relu,leaky_relu], [leaky_relu,linear,leaky_relu], [relu,relu,relu], [sigmoid,sigmoid,sigmoid], [tanh,tanh,tanh]                                                                                                                                                                                                                                                               |
| [class]                              |                                                                                                                                                                                                                                                                                                                                                                                                 |
| <code>class_drop</code>              | 0.1, 0.25, 0.4, 0.5                                                                                                                                                                                                                                                                                                                                                                             |
| <code>class_use_laynorm_inp</code>   | False, True                                                                                                                                                                                                                                                                                                                                                                                     |
| <code>class_use_batchnorm_inp</code> | False                                                                                                                                                                                                                                                                                                                                                                                           |
| <code>class_use_batchnorm</code>     | False, True                                                                                                                                                                                                                                                                                                                                                                                     |
| <code>class_use_laynorm</code>       | False, True                                                                                                                                                                                                                                                                                                                                                                                     |
| <code>class_act</code>               | [elu,elu,elu], [leaky_relu,leaky_relu,leaky_relu], [logsoftmax,logsoftmax,logsoftmax], [relu,relu,relu], [sigmoid,sigmoid,sigmoid], [softmax,softmax,softmax], [tanh,tanh,tanh]                                                                                                                                                                                                                 |

Table S9:Parameter values tested during SincNet models enhancement
